# Supplementary material for: Surface and morphology analyses, and voltammetry studies for electrochemical determination of cerium(iii) using a graphene nanobud-modified-carbon felt electrode in acidic buffer solution (pH 4.0 ± 0.05)
Source: Royal Society of Chemistry journal article supplement (doi:10.1039/d0ra07555h), 2020-01-01
Supplement: d0ra07555h1.pdf [file d0ra07555h1.pdf]

## Supporting Information

### Surface and Morphology analyses, and Voltammetry studies for electrochemical determination of Cerium(III) using Graphene Nanobud–modified–Carbon felt electrode in Acidic Buffer Solution (pH 4.0±0.05)

*Pavithra V. Ravi,<sup>1</sup> Daniel T. Thangadurai,<sup>1\*</sup> Kasi Nehru,<sup>2</sup> Yong Ill Lee,<sup>3</sup> Devaraj Nataraj,<sup>4</sup> Sabu Thomas,<sup>5</sup> Nandakumar Kalarikkal,<sup>5</sup> and Jiya Jose<sup>5</sup>*

<sup>1</sup>*Department of Nanotechnology, Sri Ramakrishana Engineering College, Affiliated to Anna University, Coimbatore–641022, Tamilnadu, India.*

<sup>2</sup>*Department of Chemistry, Anna University – Bharathidasan Institute of Technology, Tiruchirappalli–620024, India.*

<sup>3</sup>*Department of Chemistry, Changwon National University, Changwon 641-773, South Korea.*

<sup>4</sup>*Department of Physics, Bharathiar University, Coimbatore – 641046, Tamilnadu, India.*

<sup>5</sup>*International and Inter University Centre for Nanoscience and Nontechnology, Mahatma Gandhi University, Kottayam – 686560, Kerala, India.*

#### 1. Characterization of GNB

##### 1.1. Thermal characterization

Examination of thermal stability of an electrode material is vital for electrochemical applications, which are in a straight line with device performance such as efficacy, lifespan, etc. Thermal stability of as-prepared GNB was examined by Thermo-Gravimetric analyses (TGA) and Differential Scanning Calorimetric (DSC) techniques in a heating range from 50 to 900 °C with a heating rate of 10 °C min<sup>-1</sup> with N<sub>2</sub> flow of 20 mL min<sup>-1</sup> (Figure SI1). The first weight loss up to 100 °C represents the evaporation of water molecule present in GNB. Continuous weight loss at 200–500 °C may be characteristic of loss of covalently attached oxygen-containing surface functional groups linked to the edges of the GNB.<sup>1</sup> The final deprivation above 500 °C shows the decomposition of the carbon backbone.<sup>2</sup> DSC analysis results imply a distinct exothermic peak accompanying a significant weight loss around 225 °C indicating that there is one chemical reaction involved in the process (inset, Figure SI1). The decomposition of carbon backbone of graphitic structure was observed above 500 °C, which is in well accord with the TGA analysis.

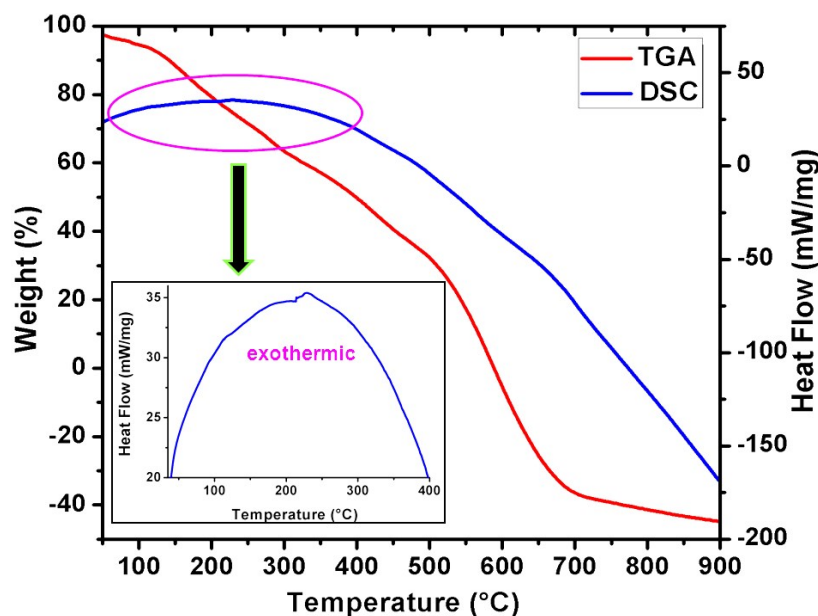

**Figure SI1.** Thermal analyzes of GNB in N<sub>2</sub> flow (20 mL/min) at a heating rate of 10 °C/min.

## 2. Fabrication of Working Electrode

The carbon felt pieces (1 cm × 1 cm) were dipped into 2.0 M of HCl solution (10 mL) for 10 min, followed by immersion in ethanol solution (2 mL) and then rinsed thoroughly with distilled water (2×10 mL). The resulting carbon felt was dried completely in room temperature. GNB (2.0 mg) colloidal solution was coated on the pretreated carbon felt and kept for drying in the incubator at 80 °C for 12 h.

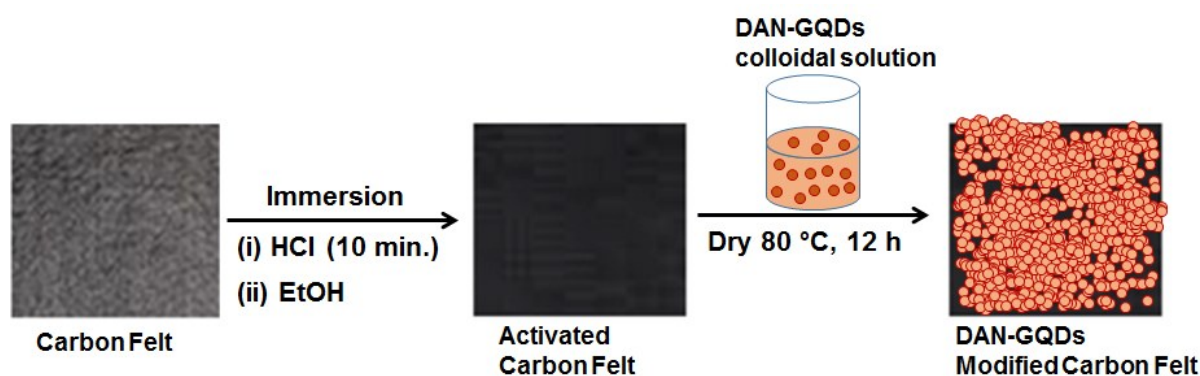

**Figure SI2.** Schematic illustration of fabrication of GNB–modified–CF electrode.

## 3. Electrochemical studies

### 3.1. CV and DPV studies

The electrochemical studies were performed with three electrode system; Ag/AgCl was used as reference electrode, Pt wire as counter electrode and GNB–modified–CF as working electrode

in Acidic Buffer Solution (pH 4.0±0.05). Initially, the CV (with scan rate of 50 mVs<sup>-1</sup>) and DPV (with set potential of 0.25 V) studies were carried out with bare CF, followed with GNB–modified–CF electrode upon addition of Ce<sup>3+</sup> (0.1 M). CV studies were also carried out with (i) fixed scan rate (50 mV/s) in different concentration of Ce<sup>3+</sup> solution (0.1 M; 0→200 μL), (ii) fixed concentration of Ce<sup>3+</sup> solution (0.1 M) in different scan rate (10→100 mV/s), and (iii) interferon studies. The influence of electrolyte pH (3→12) on the electrochemical behavior of GNB–modified–CF electrode upon addition of Ce<sup>3+</sup> was carried out with scan rate of 50mVs<sup>-1</sup> at fixed concentration of Ce<sup>3+</sup>(0.1M). Impedance studies were carried out with K<sub>3</sub>[Fe(CN)<sub>6</sub>] (2.0 mM) redox couple containing in Acidic Buffer Solution (pH 4.0±0.05) at scanning frequencies from 0.01 to 100,000 Hz. For every measurement, newly prepared GNB–modified–CF electrode was used as working electrode. Each experiment was repeated at least thrice till consistent values were obtained.

*Linear Fit (17-05-2019 12:00:27)*

**Parameters**

|   |           | Value      | Standard Error |
|---|-----------|------------|----------------|
| B | Intercept | 2.37901E-4 | 5.74344E-6     |
|   | Slope     | 5.98677E-6 | 1.03909E-7     |

**Statistics**

|                         | B       |
|-------------------------|---------|
| Number of Points        | 7       |
| Degrees of Freedom      | 5       |
| Residual Sum of Squares | 0.17875 |
| Pearson's r             | 0.99925 |
| Adj. R-Square           | 0.9982  |

**Summary**

|   | Intercept  |                | Slope      |                | Statistics    |
|---|------------|----------------|------------|----------------|---------------|
|   | Value      | Standard Error | Value      | Standard Error | Adj. R-Square |
| B | 2.37901E-4 | 5.74344E-6     | 5.98677E-6 | 1.03909E-7     | 0.9982        |

**ANOVA**

|   |       | DF | Sum of Squares | Mean Square | F Value    | Prob>F     |
|---|-------|----|----------------|-------------|------------|------------|
| B | Model | 1  | 118.67755      | 118.67755   | 3319.56499 | 2.97989E-8 |
|   | Error | 5  | 0.17875        | 0.03575     |            |            |
|   | Total | 6  | 118.8563       |             |            |            |

**Figure SI3.** Linear fit parameters for the calculated LoD from the CV obtained for GNB–modified–CF electrode with Ce<sup>3+</sup> (0.1 M; 10 μL) in ABS (pH 4.0±0.05) at different scan rate (10-100 mV/s).

Linear Fit (17-05-2019 13:01:52)

Parameters

|   |           | Value      | Standard Error |
|---|-----------|------------|----------------|
| B | Intercept | 5.48716E-6 | 3.26912E-7     |
|   | Slope     | 3.98356E-7 | 5.92321E-9     |

Statistics

|                         | B       |
|-------------------------|---------|
| Number of Points        | 8       |
| Degrees of Freedom      | 6       |
| Residual Sum of Squares | 0.4031  |
| Pearson's r             | 0.99934 |
| Adj. R-Square           | 0.99845 |

Summary

|   | Intercept  |                | Slope      |                | Statistics    |
|---|------------|----------------|------------|----------------|---------------|
|   | Value      | Standard Error | Value      | Standard Error | Adj. R-Square |
| B | 5.48716E-6 | 3.26912E-7     | 3.98356E-7 | 5.92321E-9     | 0.99845       |

ANOVA

|   |       | DF | Sum of Squares | Mean Square | F Value    | Prob>F     |
|---|-------|----|----------------|-------------|------------|------------|
| B | Model | 1  | 303.87181      | 303.87181   | 4523.00836 | 7.2696E-10 |
|   | Error | 6  | 0.4031         | 0.06718     |            |            |
|   | Total | 7  | 304.27491      |             |            |            |

**Figure SI4.** Linear fit parameters for the calculated LoD from the CV obtained for GNB-modified-CF electrode with  $Ce^{3+}$  (0.1 M; 0→200  $\mu$ L) in ABS (pH 4.0±0.05) at a scan rate of 50 mV/s.

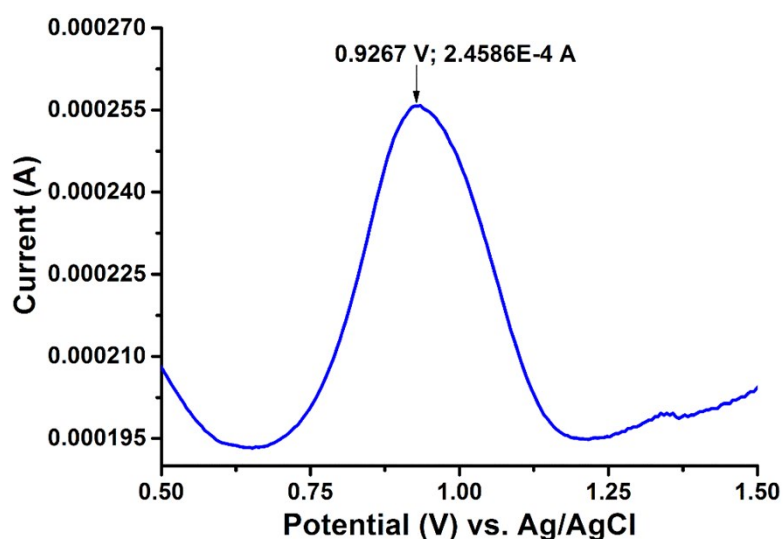

**Figure SI5.** DPV obtained for CF with  $Ce^{3+}$  (0.1 M; 10  $\mu$ L) in ABS (pH 4.0±0.05) at a scan rate of 10 mV/s.



Linear Fit (16-05-2019 22:45:46)

Parameters

|   |           | Value      | Standard Error |
|---|-----------|------------|----------------|
| B | Intercept | 5.19768E-5 | 1.90375E-6     |
|   | Slope     | 2.19863E-6 | 4.06291E-8     |

Statistics

|                         | B        |
|-------------------------|----------|
| Number of Points        | 12       |
| Degrees of Freedom      | 10       |
| Residual Sum of Squares | 22.75935 |
| Adj. R-Square           | 0.99152  |

Summary

|   | Intercept  |            | Slope      |            | Statistics    |
|---|------------|------------|------------|------------|---------------|
|   | Value      | Error      | Value      | Error      | Adj. R-Square |
| B | 5.19768E-5 | 1.90375E-6 | 2.19863E-6 | 4.06291E-8 | 0.99152       |

ANOVA

|   |       | DF | Sum of Squares | Mean Square | F Value    | Prob>F      |
|---|-------|----|----------------|-------------|------------|-------------|
| B | Model | 1  | 2928.38653     | 2928.38653  | 1286.67407 | 6.73517E-12 |
|   | Error | 10 | 22.75935       | 2.27593     |            |             |
|   | Total | 11 | 2951.14588     |             |            |             |

**Figure SI6.** Linear fit parameters for the calculated LoD from the DPV obtained for GNB-modified-CF electrode with  $Ce^{3+}$  (0.1 M; 0→200  $\mu$ L) in ABS (pH 4.0±0.05) at a scan rate of 10 mV/s.

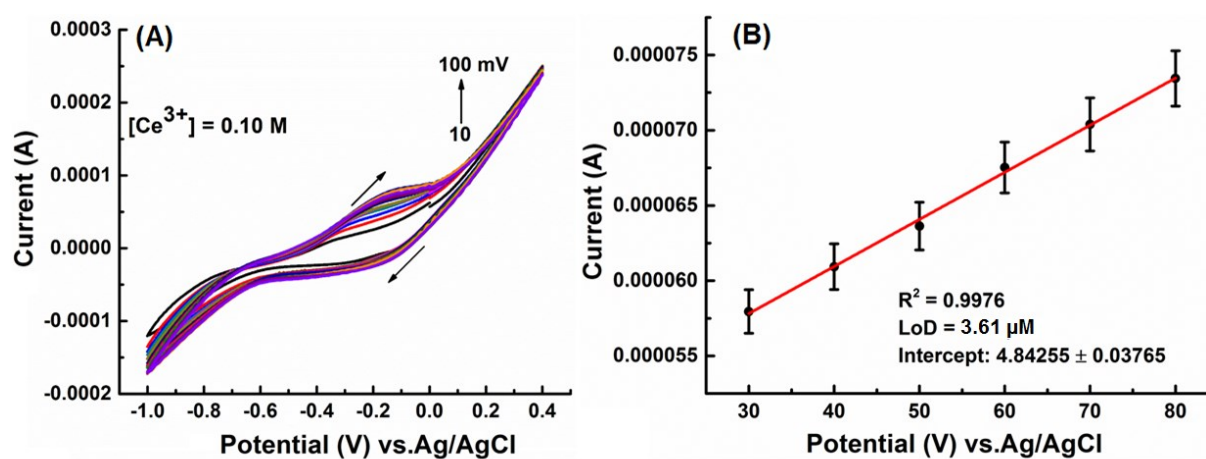

(C)

Linear Fit (26-09-2019 10:38:45)

Parameters

|   |           | Value      | Standard Error |
|---|-----------|------------|----------------|
| B | Intercept | 4.84255E-5 | 3.76516E-7     |
|   | Slope     | 3.13015E-7 | 6.85851E-9     |

Statistics

|                         | B       |
|-------------------------|---------|
| Number of Points        | 6       |
| Degrees of Freedom      | 4       |
| Residual Sum of Squares | 0.12302 |
| Pearson's r             | 0.99904 |
| Adj. R-Square           | 0.9976  |

Summary

|   | Intercept  |                | Slope      |                | Statistics    |
|---|------------|----------------|------------|----------------|---------------|
|   | Value      | Standard Error | Value      | Standard Error | Adj. R-Square |
| B | 4.84255E-5 | 3.76516E-7     | 3.13015E-7 | 6.85851E-9     | 0.9976        |

ANOVA

|   |       | DF | Sum of Squares | Mean Square | F Value    | Prob>F     |
|---|-------|----|----------------|-------------|------------|------------|
| B | Model | 1  | 64.05905       | 64.05905    | 2082.91407 | 1.37854E-6 |
|   | Error | 4  | 0.12302        | 0.03075     |            |            |
|   | Total | 5  | 64.18207       |             |            |            |

**Figure SI7.** (A) CV obtained for GNB–modified–ITO electrode with  $\text{Ce}^{3+}$  (0.1 M; 10  $\mu\text{L}$ ) in ABS (pH 4.0 $\pm$ 0.05) at different scan rate (10-100 mV/s); (B) Influence of scan rate on reduction peak current. Error bars = standard deviation of three independent measurements made from newly prepared GNB–modified–ITO electrode; (C) Linear fit parameters for the calculated LoD.

From the linear fit plot, slope and intercept is calculated. LOD is obtained from the slope and intercept by using the following equation:

$$\text{LoD} = [3 \times (\text{intercept}/\text{slope})]$$

### 3.2. Impedance spectroscopy measurements

The electrical resistance ( $R_A$ ) (in  $\Omega \text{ m}^2$ ) per unit square area of the planar electrode can be expressed as  $R_A = L_e/\sigma_e$  where,  $L_e$  = electrode thickness,  $\sigma_e$  = electrode conductivity.<sup>3</sup> Using the above equation the conductance of the CF and GNB–modified–CF electrode were calculated. From the charge-transfer resistance, phase angle values, Nyquist plot and Randles circuit, it is confirmed that the GNB–modified–CF electrode is more conductive than the bare CF.

**Table SII.** The obtained parameter values from the impedance spectra circuit for CF and GNB–modified–CF electrode in Acidic Buffer Solution (pH 4.0±0.05).

| S.No | Element | Parameter  | CF                                                                                  |         | DAN-GQDs-modified-CF  |                                                  |  |
|------|---------|------------|-------------------------------------------------------------------------------------|---------|-----------------------|--------------------------------------------------|--|
|      |         |            | Value                                                                               | Error % | Value                 | Error %                                          |  |
| 1    | $R_s$   | R          | 114.23                                                                              | 1.078   | 72.903                | 1.854                                            |  |
| 2    | $R_p$   | R          | 4180.7                                                                              | 2.775   | 68192                 | 28.611                                           |  |
| 3    | CPE     | $Y_0$      | $9.27 \times 10^{-5}$                                                               | 3.237   | $8.73 \times 10^{-5}$ | 3.22                                             |  |
| 4    |         | N          | 0.75834                                                                             | 0.989   | 0.79824               | 1.054                                            |  |
| 5    |         | $\gamma^2$ | 1.0367                                                                              |         | 3.0777                |                                                  |  |
|      |         |            | 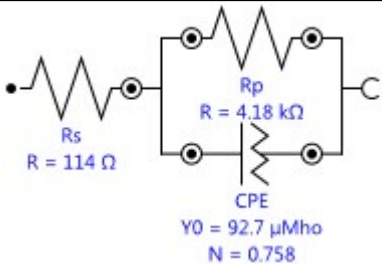 |         |                       | For circuit, please refer Figure 7 in main text. |  |

Where,  $R_s$  – Resistor in series (electrode resistance) ;  $R_p$  – Resistor in parallel (electrolyte resistance); CPE – Constant Phase element; N – phase change value occurred while fitting circuit;  $\gamma^2$ – Chi-Squared.

#### 4. Analysis of GNB–modified–CF electrode surface

(A)

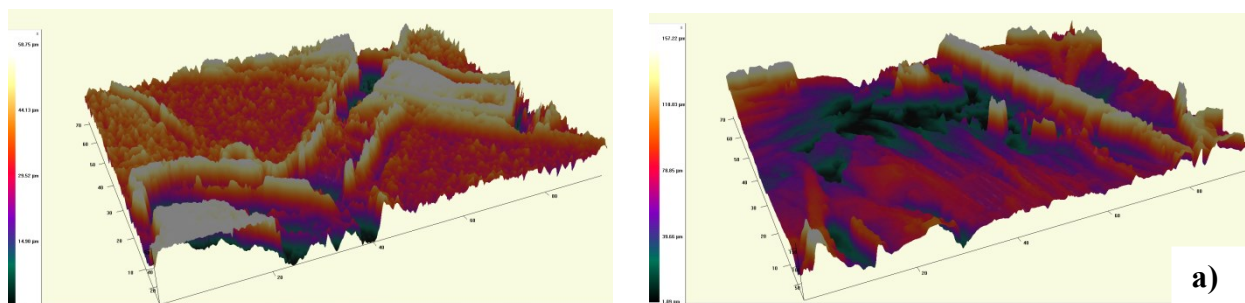

(B)

**Zeta Analysis Report**  
Image Name: Zeta Image3 File Name:  
Date Acquired: Fri Aug 02 15:01:06 2019 Today: Fri Aug 02 15:01:06 2019  
Z Range: 61µm No. of Steps: 200 Step Size: 0.308µm Field of View: 95µm x 71µm

|      | Cursor Left |       | Cursor Right |       | Cursor L-R |       |        |
|------|-------------|-------|--------------|-------|------------|-------|--------|
|      | Avg Ht      | Width | Avg Ht       | Width | Step       | Dist  | Angle  |
| 1    | 34.16       | 7.990 | 25.32        | 7.904 | -8.843     | 83.63 | -6.036 |
| 2    | 36.97       | 7.990 | 32.13        | 7.904 | -4.845     | 83.63 | -3.315 |
| 3    | 36.67       | 7.990 | 35.15        | 7.904 | -1.511     | 83.63 | -1.035 |
| Min  | 34.16       | 7.990 | 25.32        | 7.904 | -8.843     | 83.63 | -6.036 |
| Max  | 36.97       | 7.990 | 35.15        | 7.904 | -1.511     | 83.63 | -1.035 |
| Mean | 35.93       | 7.990 | 30.87        | 7.904 | -5.066     | 83.63 | -3.462 |
| SD   | 1.257       | 0     | 4.112        | 0     | 2.997      | 0     | 2.044  |
| Var% | 3.50%       | 0%    | 13.3%        | 0%    | -59.2%     | 0%    | -59.0% |

a)

**Zeta Analysis Report**  
Image Name: Zeta Image6 File Name:  
Date Acquired: Fri Aug 02 15:09:18 2019 Today: Fri Aug 02 15:09:19 2019  
Z Range: 163µm No. of Steps: 200 Step Size: 0.820µm Field of View: 95µm x 71µm

|      | Cursor Left |       | Cursor Right |       | Cursor L-R |       |        |
|------|-------------|-------|--------------|-------|------------|-------|--------|
|      | Avg Ht      | Width | Avg Ht       | Width | Step       | Dist  | Angle  |
| 1    | 46.51       | 7.990 | 55.31        | 7.904 | 8.803      | 83.63 | 6.009  |
| 2    | 56.00       | 7.990 | 50.96        | 7.904 | -5.044     | 83.63 | -3.452 |
| 3    | 68.15       | 7.990 | 99.13        | 7.904 | 30.98      | 83.63 | 20.32  |
| Min  | 46.51       | 7.990 | 50.96        | 7.904 | -5.044     | 83.63 | -3.452 |
| Max  | 68.15       | 7.990 | 99.13        | 7.904 | 30.98      | 83.63 | 20.32  |
| Mean | 56.89       | 7.990 | 68.46        | 7.904 | 11.58      | 83.63 | 7.627  |
| SD   | 8.855       | 0     | 21.75        | 0     | 14.84      | 0     | 9.774  |
| Var% | 15.6%       | 0%    | 31.8%        | 0%    | 128.1%     | 0%    | 128.1% |

b)

(C)

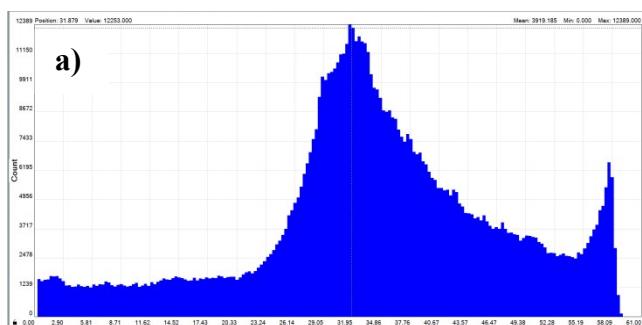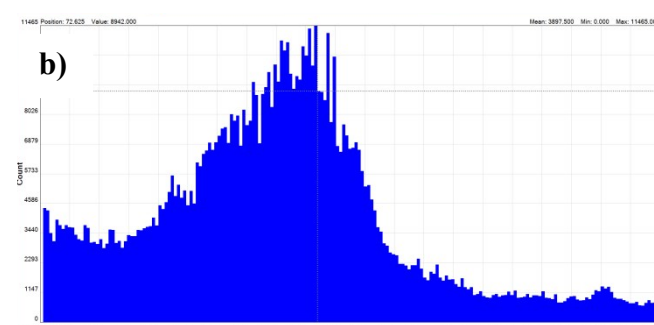

(D)

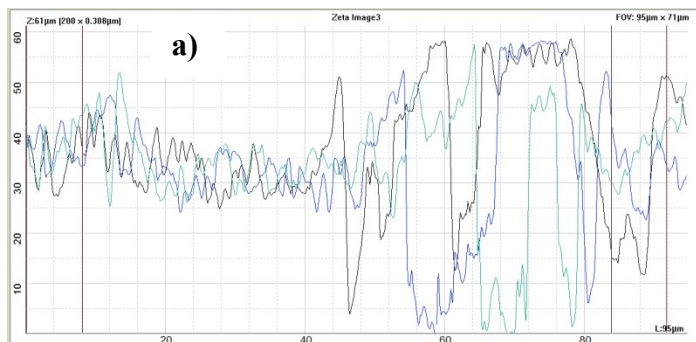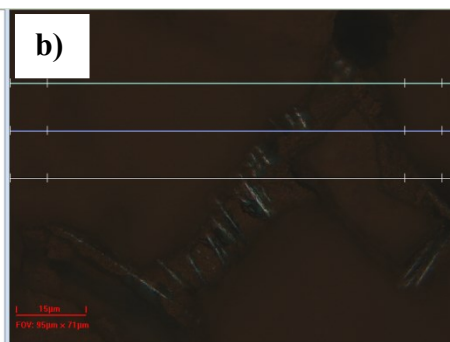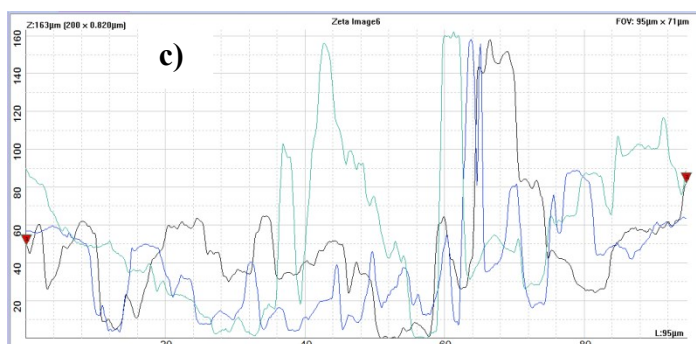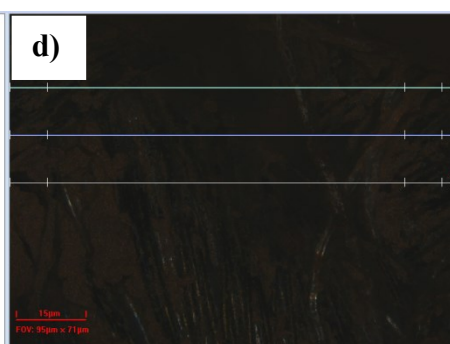

**Figure S18.** (A) Optical profilometer 3D images of GNB-modified-CF electrode before (a) and after (b) electrochemical determination. (B) Corresponding surface parameter details, (C)



histogram of surface parameter, and (D) section analysis of the working electrode before (a and b) and after (c and d) the electrochemical determination.

(A)

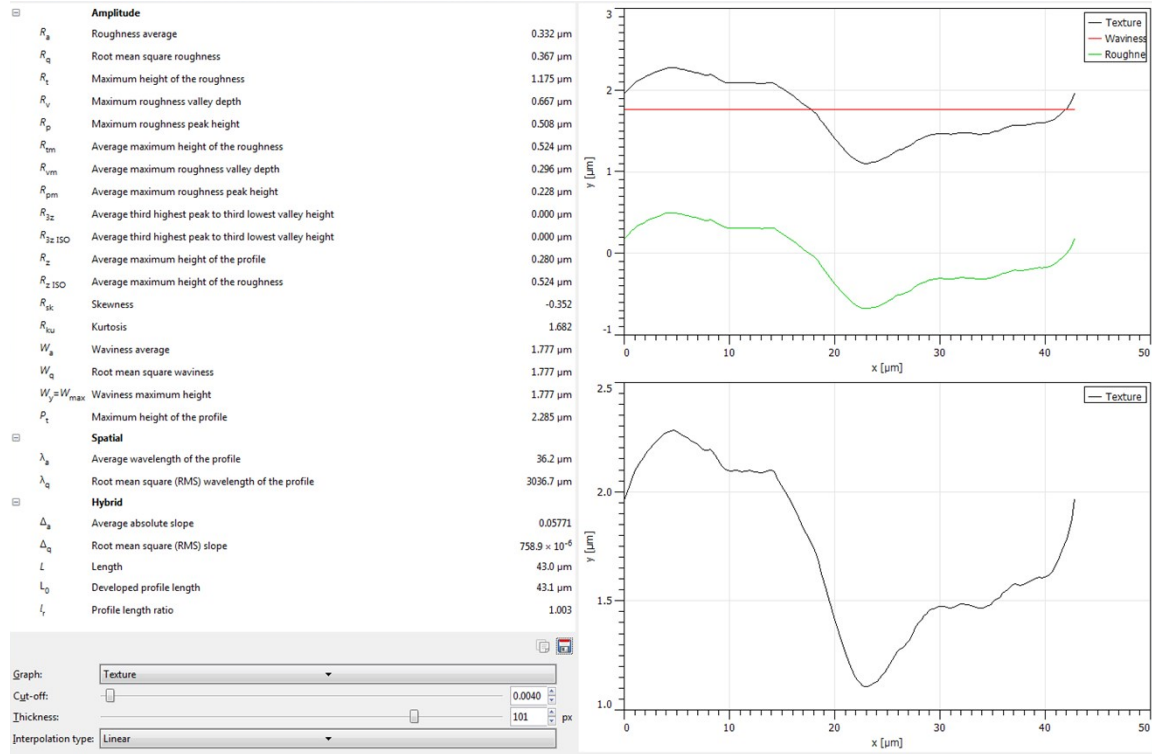

(B)

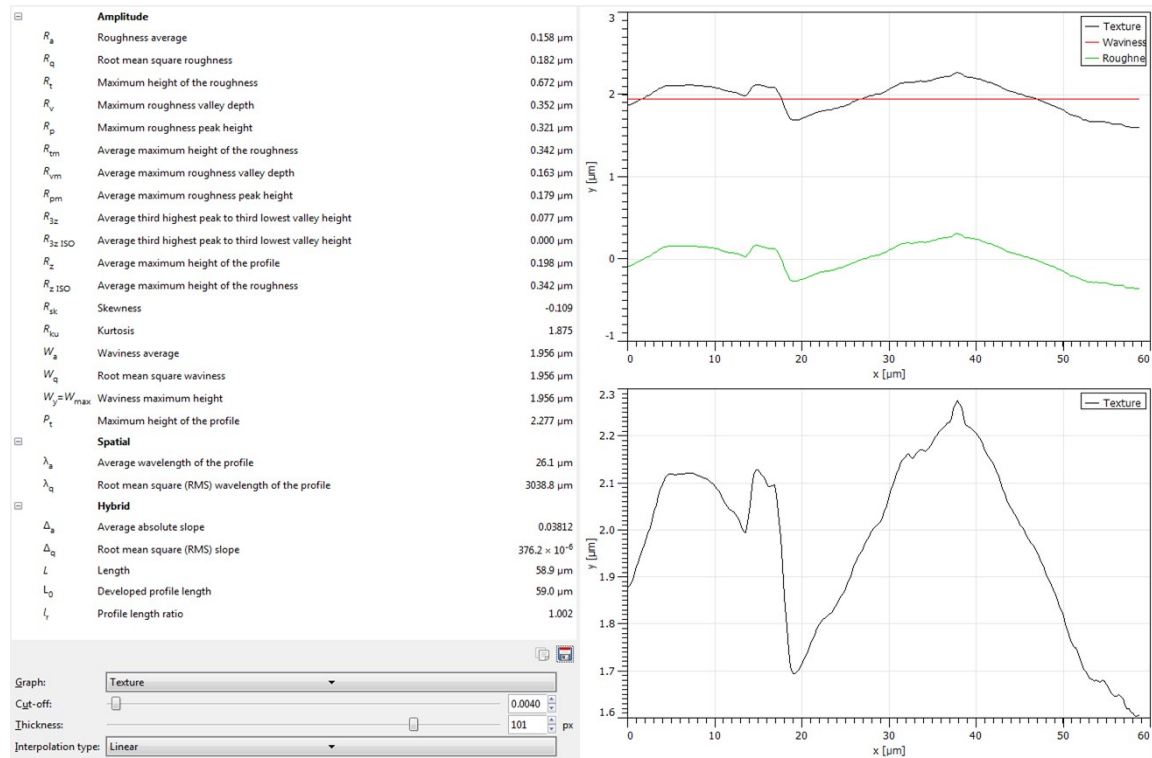

**Figure SI9.** Amplitude, spatial and hybrid details of AFM images of GNB-modified-ITO electrode (A) before and (B) after the determination of  $\text{Ce}^{3+}$  by CV analysis.

(A)

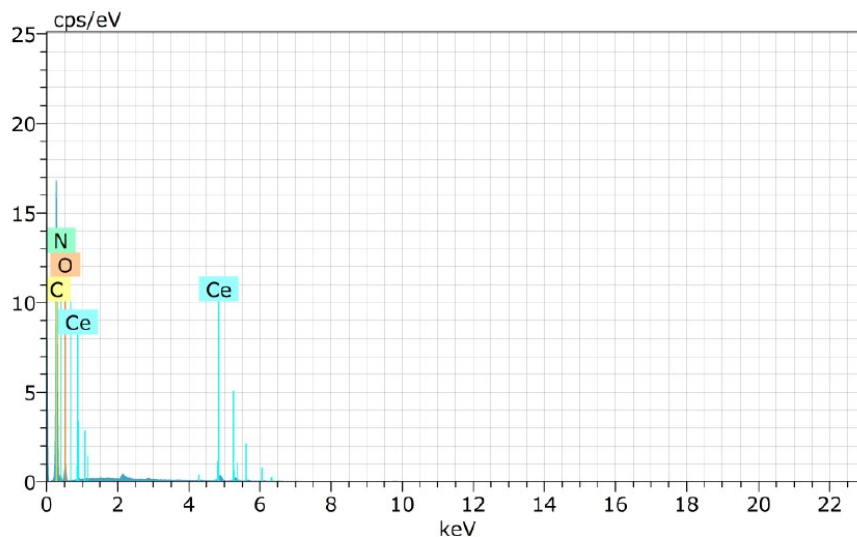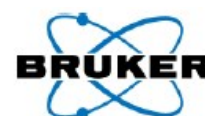

Spectrum: Objects 5008

| El     | AN | Series   | unn. C [wt.%] | norm. C [wt.%] | Atom. C [at.%] | Error (1 Sigma) [wt.%] |
|--------|----|----------|---------------|----------------|----------------|------------------------|
| C      | 6  | K-series | 66.85         | 66.85          | 74.23          | 7.51                   |
| O      | 8  | K-series | 14.37         | 14.37          | 11.98          | 2.13                   |
| N      | 7  | K-series | 14.02         | 14.02          | 13.34          | 2.44                   |
| Ce     | 58 | L-series | 4.76          | 4.76           | 0.45           | 0.17                   |
| Total: |    |          | 100.00        | 100.00         | 100.00         |                        |

(B)

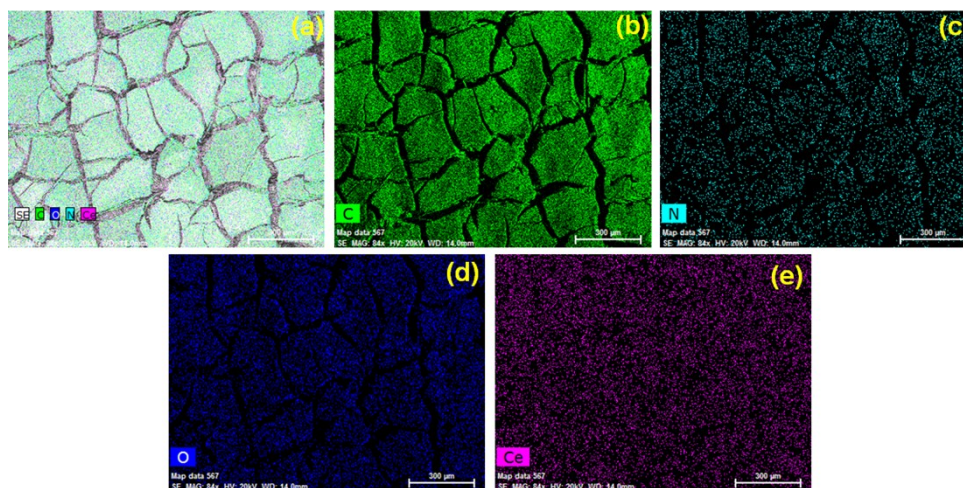

**Figure SI10.** (A) EDAX data of GNB-modified-CF electrode after the determination of  $Ce^{3+}$  by CV analysis in Acidic Buffer Solution (pH  $4.0 \pm 0.05$ ) at a scan rate of 50 mV/s; (B) Elemental mapping of GNB-modified-CF electrode after the determination of  $Ce^{3+}$  (a), C (b), N (c), O (d) and Ce (e).

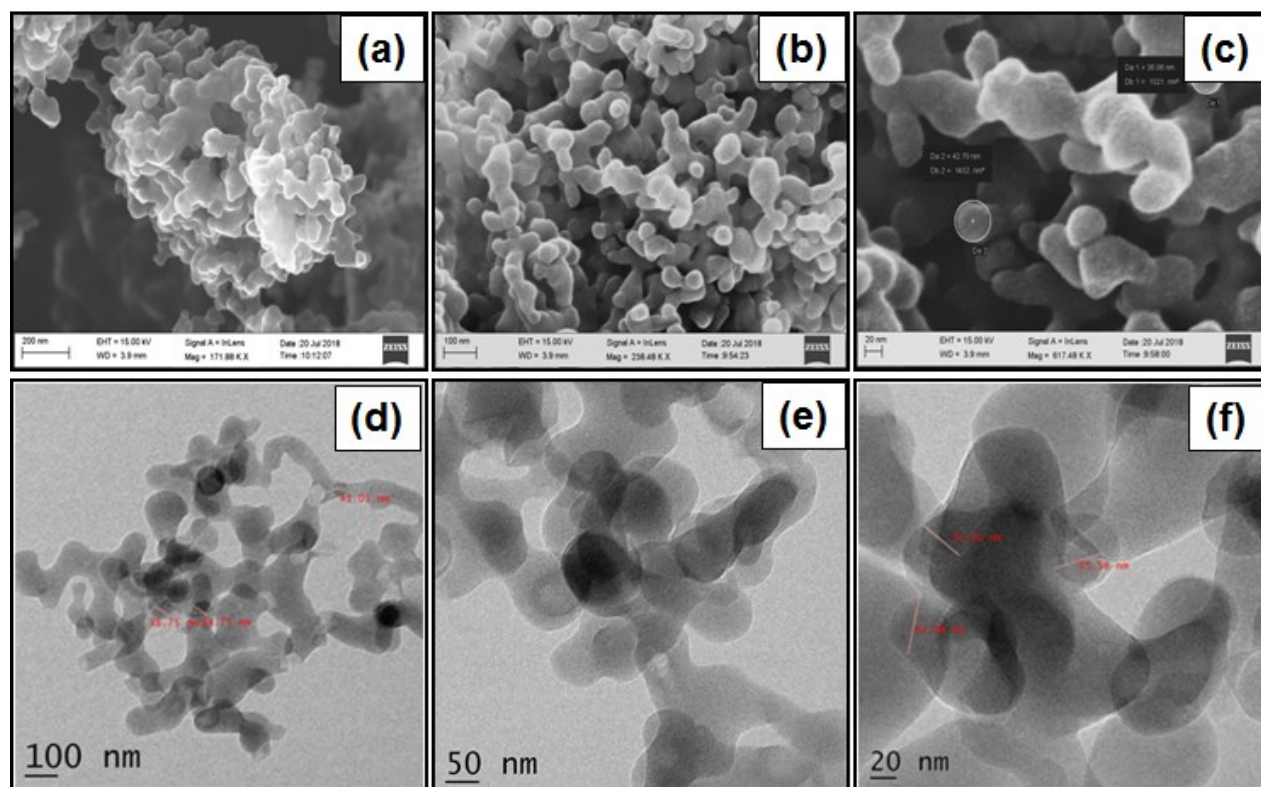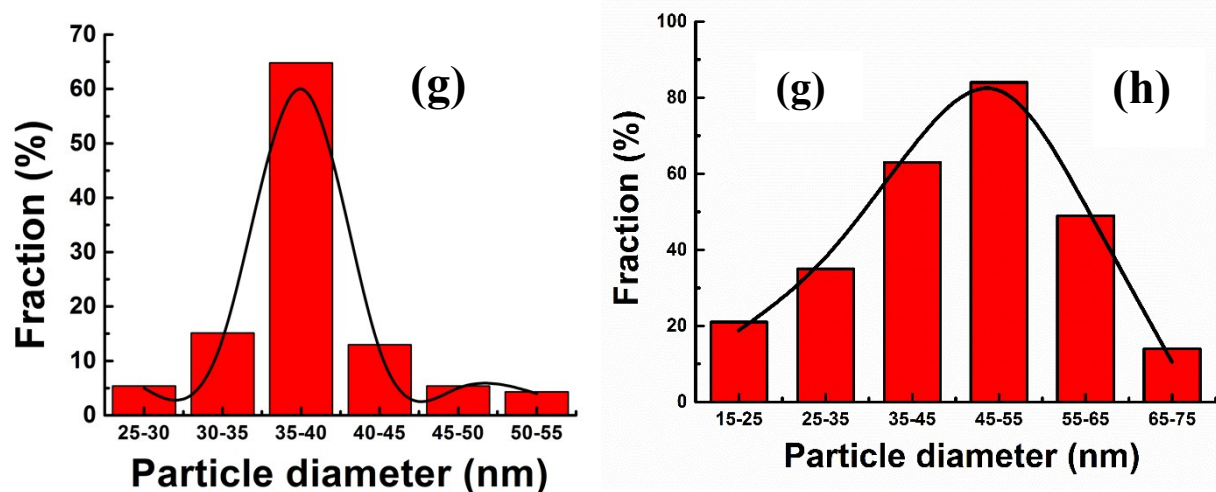

**Figure SI11.** FE-SEM (a-c) and HR-TEM (d-f) images of GNB clearly represents the formation of NBs with an average diameter of 35-40 nm. Scale bar (a) 200 nm, (b) 100 nm, (c) 20 nm, and (d) 100 nm, 50 nm, 20 nm. Size distributions of GNB before and after electrochemical

determination of  $\text{Ce}^{3+}$  (g, h, respectively). These image (a→g) are reprinted with permission from ACS Appl. Mater. Interfaces 11, 19339–19349 (2019).

## 5. XPS analysis

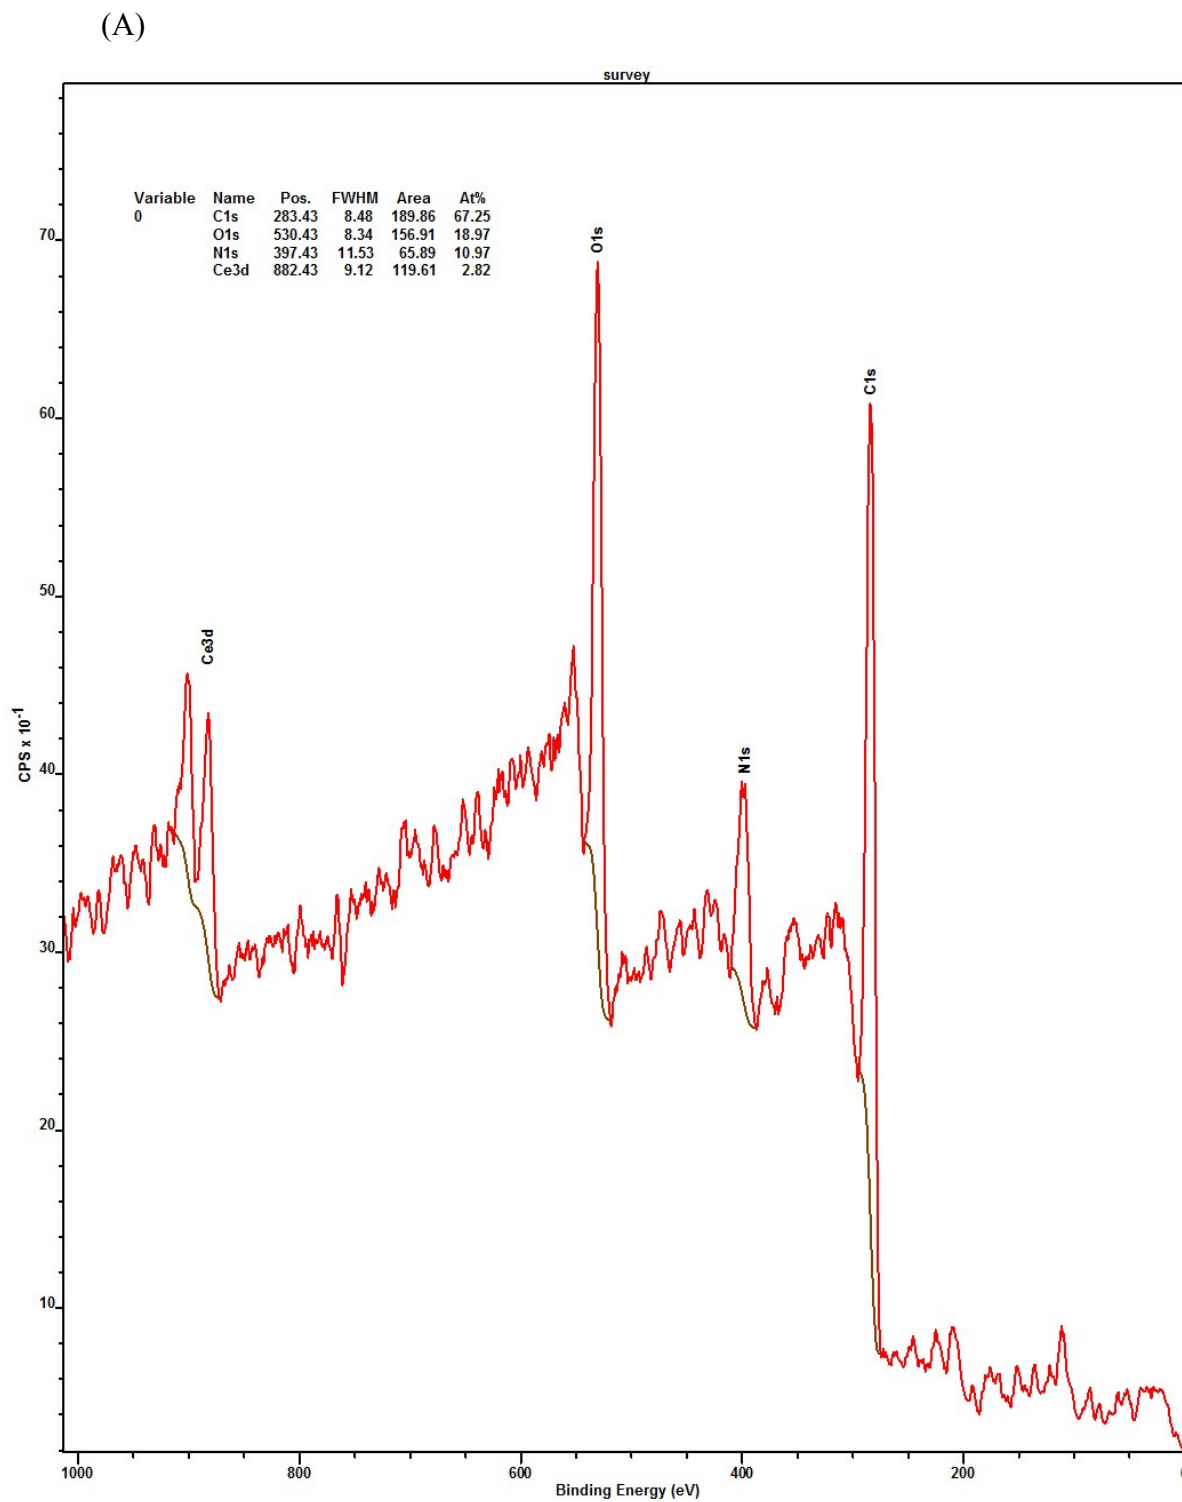



(B)

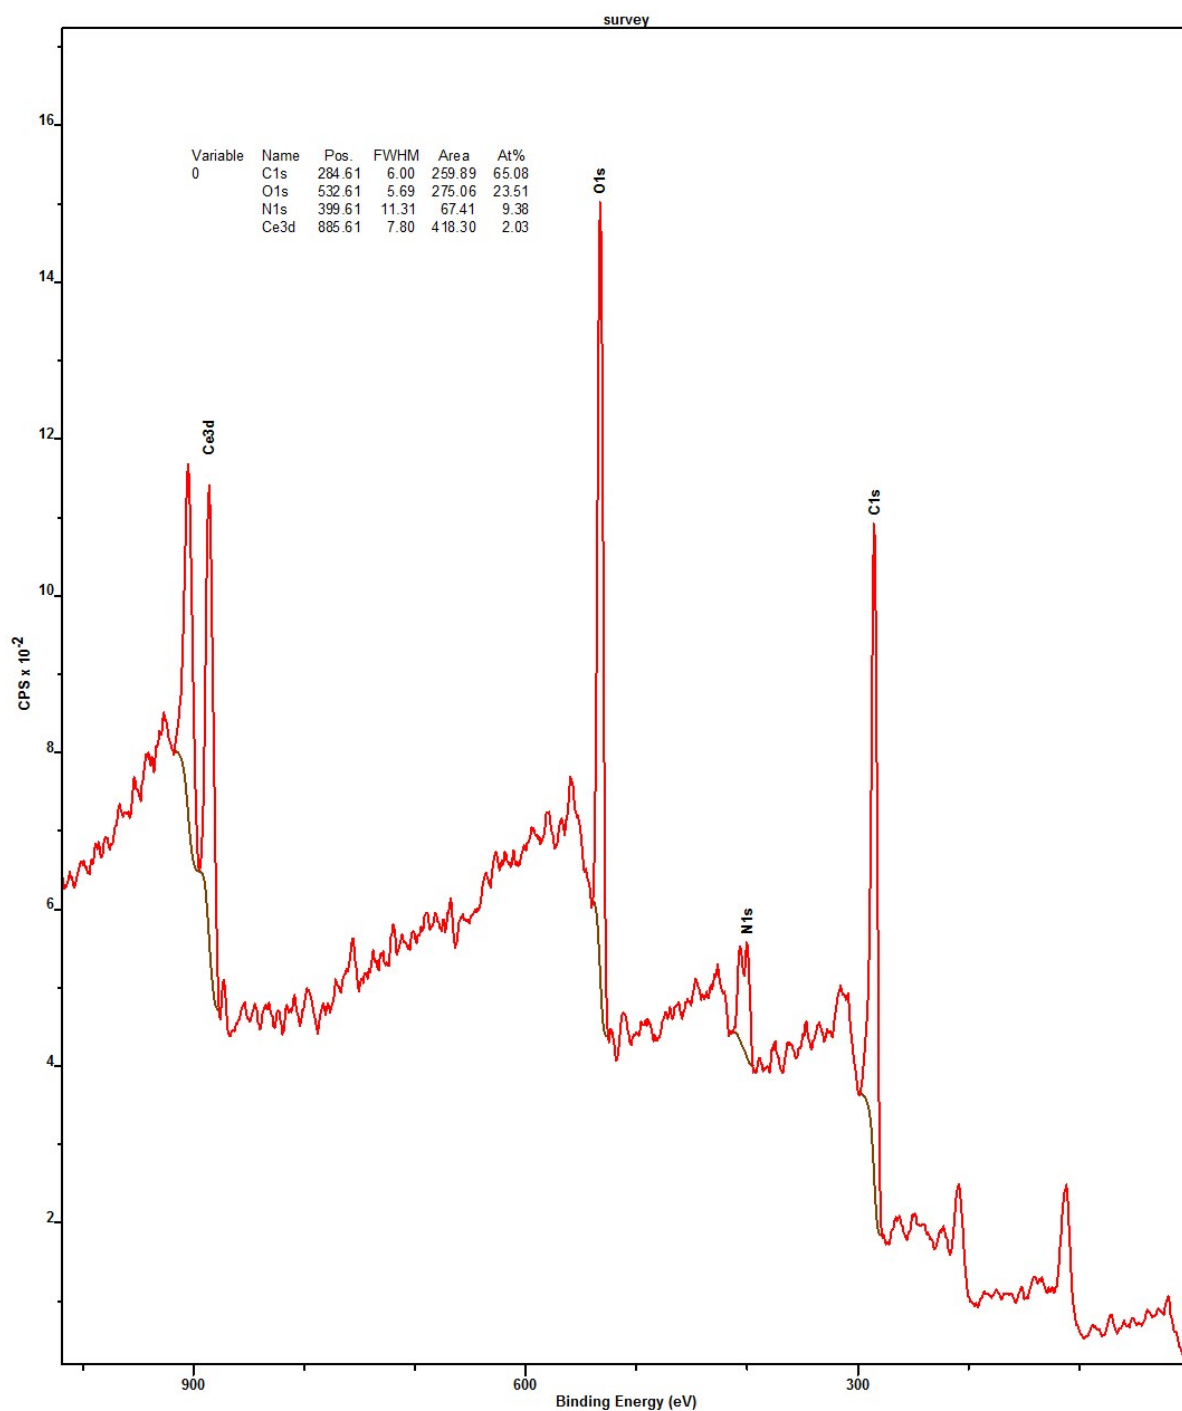

**Figure SI12.** X-ray Photoelectron survey spectrum of GNB-modified-CF electrode (A) and GNB-modified-ITO electrode (B) with at% details.

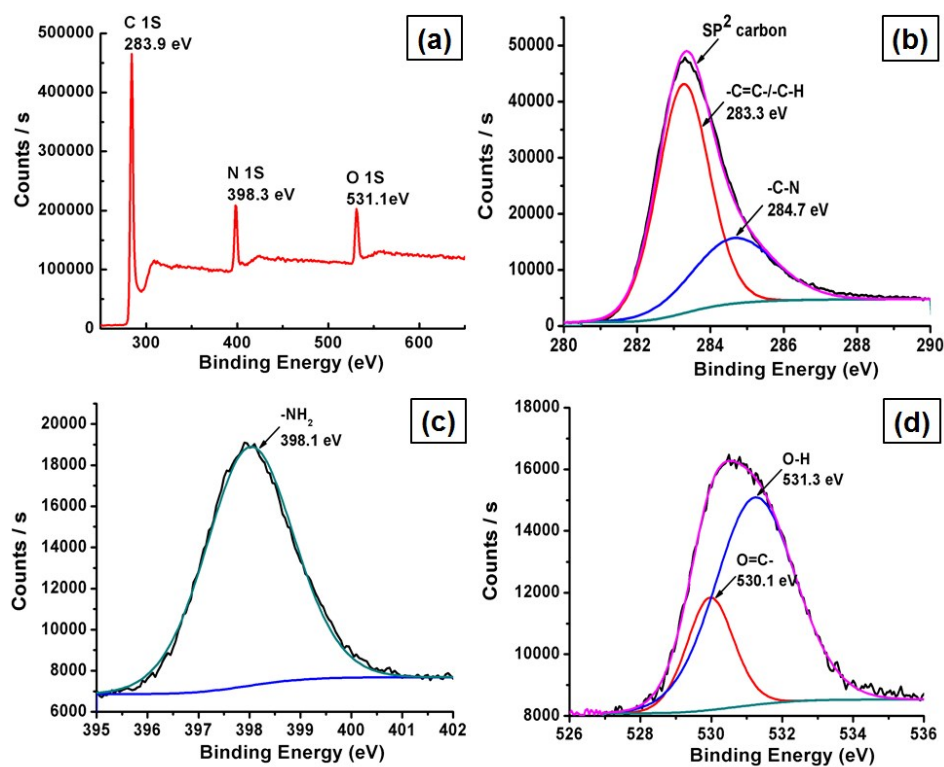

**Figure SI13.** X-ray Photoelectron Spectrum of GNB: survey spectrum (a); high resolution XPS of C 1s (b); N 1s (c); O 1s (d). These XPS image are reprinted with the permission from ACS Appl. Mater. Interfaces 11, 19339–19349 (2019).

## 6. Raman spectroscopy studies

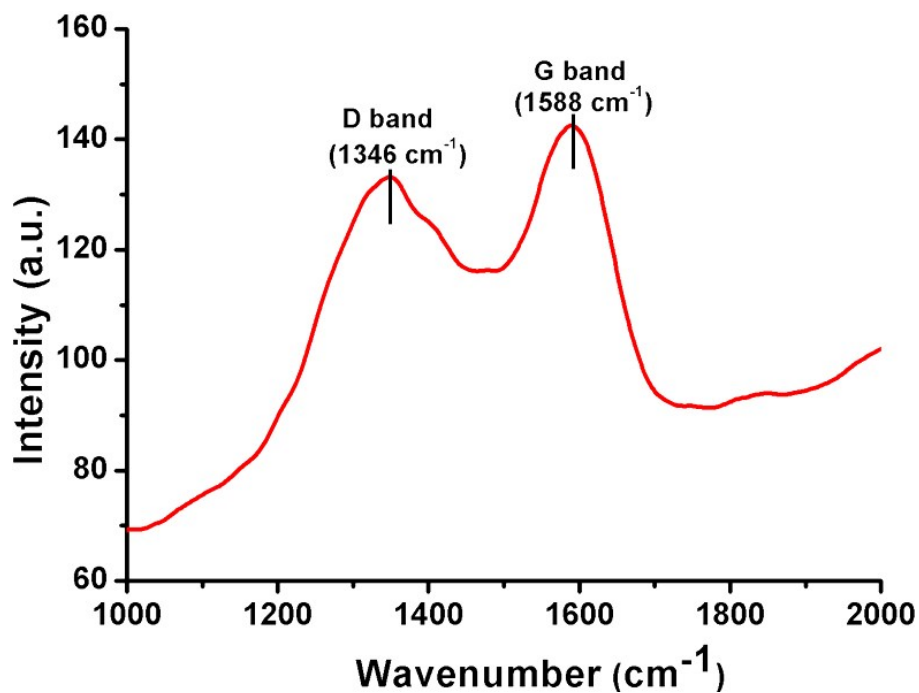

**Figure SI14.** Raman spectrum of as-prepared GNB.

**Table SI2.** Comparison of reported probes for Ce<sup>3+</sup> detection so for.

| <b>Publication details</b>                                     | <b>Material</b>                                                                                  | <b>LoD</b>                                   | <b>ToD</b> | <b>Method</b>             |
|----------------------------------------------------------------|--------------------------------------------------------------------------------------------------|----------------------------------------------|------------|---------------------------|
| <i>Sens. Actua. B.</i><br>174 (2012)<br>237-244                | Schiff Base-Carbon<br>Nanotube–Nanosilica–Ionic<br>Liquid                                        | 6.45 ×<br>10 <sup>-9</sup> M                 | 5 sec      | Potentiometry             |
| <i>Chem. Eng. J.</i><br>228 (2013)<br>327–335                  | 4-Tert-Octyl-4-<br>((Phenyl)Diazenyl)Phenol                                                      | 0.18 lg/L                                    | 25 min     | Adsorption                |
| <i>Chem. Eng. J.</i><br>265 (2015)<br>210–218                  | Organic Ligand Of 4-<br>Dodecyl-6-((4-<br>(Hexyloxy)Phenyl)<br>Diazenyl) Benzene-1,3-Diol        | 0.12 lg/L                                    | 25 min     | Adsorption                |
| <i>Spectrochimica<br/>Acta Part A</i><br>206 (2019)<br>240-245 | Carbon Nanodots                                                                                  | 0.7 μM                                       | -          | Fluorescence<br>quenching |
| <i>J. Fluoresc.</i><br>27 (2017)<br>331-338                    | Graphene Quantum Dots                                                                            | 3.8×10 <sup>-7</sup><br>mol L <sup>-1</sup>  | 1 min      | Fluorescence<br>quenching |
| <i>Biosens.<br/>Bioelectron.</i><br>68 (2015) 598-<br>603      | Gnps Synthesized Using The<br>Extract Of Solanum<br>Lycopersicums                                | 2 to 50<br>ppm                               | 10 min     | UV<br>DLS                 |
| <i>Talanta,</i><br>200 (2019)<br>249-255                       | Silver Sulfide Quantum<br>Dots (Ag <sub>2</sub> S) And<br>Graphitic Carbon<br>Nitride Nanosheets | 6.4× 10 <sup>-8</sup><br>mol L <sup>-1</sup> | 40 min     | Fluorescence<br>quenching |
| <i>Mater. Lett.</i><br>227 (2018)<br>154–157                   | Graphene Oxide Resorcinol<br>Hybrid Material                                                     | -                                            | 2 min      | PET and ICT<br>processes  |
| <i>Electro-<br/>analysis</i><br>21 (2009)<br>1605-1610         | N'-[(2-Hydroxyphenyl)<br>Methylidene]-2-<br>Furohydrazide                                        | 0.8 nmol<br>dm <sup>-3</sup>                 | -          | Voltammetric              |

|                                                             |                                                                                               |                                            |                   |                                             |
|-------------------------------------------------------------|-----------------------------------------------------------------------------------------------|--------------------------------------------|-------------------|---------------------------------------------|
| <i>J. Rare Earths</i> ,<br>28 (2010)<br>387-390             | Tribromoarsenazo                                                                              | $5.1 \times 10^{-8}$ mol/L<br>ng/mL        | -                 | Spectrophotometric                          |
| <i>J. Electroanal. Chem.</i> 808<br>(2018) 41-49            | Electropolymerized Poly-Catechol and Ion-Imprinted Membrane                                   | $1 \times 10^{-12}$ mol L <sup>-1</sup>    | -                 | Adsorptive stripping voltammetry            |
| <i>Chemical Data Collections</i> ,<br>13–14 (2018)<br>28-39 | 6-{4-(2,4-Dihydroxy-Phenyl)Diazenyl}Phenyl}-2-Oxo-4-Phenyl-1,2-Dihydropyridine-3-Carbonitrile | 0.6 ng molL <sup>-1</sup>                  | -                 | Spectrophotometric                          |
| <i>J. Fluores.</i><br>25 (2015)<br>1855-1866                | Glycine Dithiocarbamate (GDTC)-Functionalized Manganese Doped ZnS Quantum Dots (Qds)          | $2.3 \times 10^{-7}$ molL <sup>-1</sup>    | -                 | Spectrophotometric                          |
| <i>Electroanal.</i><br>29 (2017)<br>1124-1130               | Indium Tin Oxide                                                                              | 5.8 nM                                     | <1 min            | Stripping voltammetric                      |
| <i>Sens. Actua. B</i><br>191 (2014)<br>192–203              | Thiol surfactant assembled on gold nanoparticles                                              | $3.25 \times 10^{-10}$ mol L <sup>-1</sup> | < 1 min           | Potentiometry                               |
| <b>Current work</b>                                         | <b>Functionalized Graphene Quantum Dots (DAN-GQDs)</b>                                        | <b>2.60 μM</b>                             | <b>&lt; 1 min</b> | <b>Electrochemical methods (CV and DPV)</b> |

## References

1. Yan, R.; Wu, H.; Zheng, Q.; Wang, J.; Huang, J.; Ding, K.; Guo, Q.; Wang, J. Graphene Quantum Dots Cut from Graphene Flakes: High Electrocatalytic Activity for Oxygen Reduction and Low Cytotoxicity. *RSC Adv.* **2014**, *4*, 23097–23106.
2. Maity, N.; Kuila, A.; Das, S.; Mandal, D.; Shit, A.; Nandi, A. K. Optoelectronic and Photovoltaic Properties of Graphene Quantum Dot-Polyaniline Nanostructures. *J. Mater. Chem. A* **2015**, *3*, 20736–20748.
3. Mei, B. A.; Munteshari, O.; Lau, J.; Dunn, B.; Pilon, L. Physical Interpretations of Nyquist Plots for EDLC Electrodes and Devices. *J. Phys. Chem. C* **2018**, *122*, 194–206.
